# Supplementary material for: Assessing the effect of a partly unobserved, exogenous, binary time-dependent covariate on survival probabilities using generalised pseudo-values
Source: Springer Nature journal article supplement (doi:10.1186/s12874-017-0430-5), 2018-01-19
Supplement: MOESM1 [file 15389810]

Assessing the effect of a partly unobserved, exogenous, binary time-dependent covariate on survival probabilities using generalised pseudo-values

Ulrike Pötschger<sup>1,2</sup>, Harald Heinzl<sup>2</sup>, Maria Grazia Valsecchi<sup>3</sup>, Martina Mittlböck<sup>2\*</sup>

## -APPENDIX-

### Section A: Properties of the 1→2 pseudo-value

Consider a value  $z$ ,  $0 \leq z \leq t^{search}$ , and let  $\hat{S}(t^*|T \geq z)$  denote the survival probability at  $t^*$  estimated by Kaplan-Meier based on all  $r$  patients still at risk at  $z$ . The common pseudo-value [1] for the  $k$ -th patient,  $k = 1 \dots r$ , is now defined as

$$\hat{U}_k = r\hat{S}(t^*|T \geq z) - (r-1)\hat{S}^{-k}(t^*|T \geq z). \quad (1)$$

Let  $z_k$  denote the waiting time of patient  $k$  which is set to, say,  $z+1$ , for patients in state 0 at  $z$ . Now  $Z_k = (\min(z_k, z), I(z_k \leq z))$  is the waiting time history of patient  $k$  up to time  $z$ . Since  $Z_k$  is a vector of baseline variables at  $z$  the arguments with respect to the asymptotic properties of the pseudo-values of Jacobsen and Martinussen [2] apply in analogy.

Now  $((\tilde{T}_k - z, D_k), Z_k)$ ,  $k = 1 \dots r$ , can be considered as i.i.d. replicates of the population at risk at  $z$ . Using the von Mises expansion the pseudo-value can be expressed as

$$\hat{U}_k = \theta + \psi(\tilde{T}_k - z, D_k) + o_p(1)$$

where  $\theta = P(T > t^* | T \geq z) = S(t^* | T \geq z)$  denotes the survival probability at  $t^*$  of the population at risk at  $z$ ; and  $\hat{S}(t^* | T \geq z)$  is an asymptotically unbiased estimate of  $\theta$ .

Jacobson and Martinussen [2] showed that

$$E\left[\psi\left(\tilde{T}_k - z, D_k\right) \mid Z_k\right] = \theta_k - \theta.$$

Here,  $\theta_k = P\left(T_k > t^* \mid T_k \geq z, Z_k\right) = S\left(t^* \mid T \geq z, Z_k\right)$  is the survival probability at  $t^*$  conditional on both, being alive at  $z$  and the waiting time history of patient  $k$  up to  $z$ .

Consequently it follows that

$$E\left[\hat{U}_k\right] = \theta_k + o_p(1).$$

By varying  $z$  between 0 and  $t^{search}$ , a plethora of pseudo-values could be computed. However, the primary interest is in values of  $z$  that correspond to actually observed waiting times  $w_i$ ,  $i = 1 \dots m$

. Given  $z = w_i$  and a patient with  $z_k = w_i$ , then

$$\theta_k = S\left(t^* \mid T \geq w_i, W = w_i\right) = \int_{w_i}^{t^*} \lambda_{12}(v, v - w_i) dv$$

which is the quantity to be estimated in the main paper.

## Section B: Waiting time distribution in patients with a donor

Here, the density  $f_{01}(w)$  of partly unobservable times to donor identification (waiting times) in patients with a donor available is related to the density  $q(w)$  of observable waiting times up to  $t^{search}$  not prevented by competing risks, like death and early censoring represented by  $\lambda_{02}(t)$  and  $\lambda_C(t)$ , respectively. Now,

$$q(w) = \frac{1}{p_m} \lambda_{01}(w) \exp\left[-\int_0^w \lambda_{01}(v) + \lambda_{02}(v) + \lambda_C(v) dv\right]$$

with  $p_m = \int_0^{t_{search}} \lambda_{01}(x) \exp\left[-\int_0^x \lambda_{01}(v) + \lambda_{02}(v) + \lambda_c(v) dv\right] dx$ , so that  $\int_0^{t_{search}} q(w) dw = 1$ . Here,  $p_m$  is

the expected proportion of patients with observed  $0 \rightarrow 1$  transition in the population of patients with a donor available. Due to the competing risks  $\lambda_{02}(t)$  and  $\lambda_c(t)$ , longer waiting times are underrepresented among the  $m$  patients with observed  $0 \rightarrow 1$  transitions.

For the estimation of  $S_1(t^*)$ , the density  $f_{01}(w)$  of times to donor identification of all patients with a donor available (includes patients with ceased donor search) is needed. This quantity is

$$f_{01}(w) = \lambda_{01}(w) \exp\left[-\int_0^w \lambda_{01}(v) dv\right]$$

and it is linked to  $q(w)$  by

$$f_{01}(w) = \frac{q(w) p_m}{\exp\left[-\int_0^w \lambda_{02}(v) + \lambda_c(v) dv\right]}.$$

Given  $W=w$ , the denominator represents the probability that a  $0 \rightarrow 1$  transition can actually be observed at time  $w$ .

### Section C: Generation of simulated data

Section C is concerned with the generation of simulated survival and waiting times. Parameter values used in the simulations can be found in Table S1.

Let  $S_{wb}(t; \omega, \vartheta) = \exp(-\omega t^\vartheta)$  denote the survival function of a Weibull distribution for  $t \geq 0$ , where  $\vartheta > 0$  is the shape parameter and  $\omega > 0$  represents the scale parameter. Let  $f_{wb}(t; \omega, \vartheta)$  denote the corresponding density distribution.

For direct  $0 \rightarrow 2$  transitions, the simulations are based on the parametric mixture survival function

$$S_0(t) = \pi_{02} S_{wb}(t; \omega_{02}, \theta_{02}) + (1 - \pi_{02}).$$

Here,  $(1 - \pi_{02})$  is the proportion of cured patients and  $S_0(t)$  converges to  $(1 - \pi_{02})$  with increasing  $t$ . This mimics the typical situation in paediatric oncology where the plateau in the survival

function indicates the presence of long-term survivors (cured patients).  $\pi_{02}$  is the proportion of

patients that are susceptible for a direct  $0 \rightarrow 2$  transition with corresponding survival function

$S_{wb}(t; \omega_{02}, \theta_{02})$ . Until  $t^{search} = t^* = 5$  years, the hazard functions for a  $0 \rightarrow 2$  transition are

$$\lambda_{02}(t) = \lambda'_{02}(t) = \frac{\pi_{02} f_{wb}(t; \omega_{02}, \theta_{02})}{S_0(t)}$$
 in the populations with and without donor available,

respectively. More details on parametric mixture survival function can be found in Sposto [4].

Additionally, times to  $0 \rightarrow 1$  transitions (waiting times  $w$ ) need to be simulated. It is assumed that a

proportion of  $\pi_{01}$  patients have a donor available. For scenarios A-G, a log-normal waiting time

distribution  $f_{01}(w)$  with parameters  $\mu_{01}$  and  $\sigma_{01}$ , truncated at  $t^{search}$ , is used. The cumulative

density function of the log-normal distribution is for  $x > 0$

$$CDF(x, \mu, \sigma) = \frac{1}{\sigma\sqrt{2\pi}} \int_{-\infty}^{\log(x)} e^{-\left[\frac{(v-\mu)^2}{2\sigma^2}\right]} dv$$

In scenario I, discrete waiting times at  $w=0.5, 1$  and  $3$  years and the probability mass function

$$f_{01}(w) = 1/3 \text{ are assumed.}$$

For the population with a donor available and for a specific waiting time  $w \leq t$ , the following form of the hazard function for a  $1 \rightarrow 2$  transition was used in the simulations:

$$\lambda_{12}(t, t-w) = r\lambda_{02}(t) + \lambda_T(t-w)$$

Here  $\lambda_{12}(t, t-w)$  depends on both, the time elapsed since time zero and the time elapsed since the  $0 \rightarrow 1$  transition at time  $w$ . The first term,  $r\lambda_{02}(t)$ , represents the long-term effect of the time-dependent intervention, which is favourable when  $r < 1$ . The second term,  $\lambda_T(t-w)$ , allows for additional short-term risks due to the intervention and follows a Weibull mixture distribution  $S_T(t-w) = \pi_T S_{wb}(t-w; \omega_T, \mathcal{G}_T) + (1 - \pi_T)$ . The proportion  $\pi_T$  represents the specific intervention related events in state 1 that would be observed in absence of any other competing events.

## **Section D: Software implementation**

The proposed method can be straightforwardly implemented using standard routines available in the majority of statistical software packages. Firstly, Kaplan-Meier estimates are repeatedly computed to derive generalised pseudo-values; subsequently, a generalised linear model is fitted.

In SAS, the procedure LIFETEST provides Kaplan-Meier estimates for survival probabilities. The procedure GENMOD can be used for fitting a generalised linear model. Note, that the model specification is done identically to the original pseudo-value approach, e.g. see Klein et al. [5] for details.

In R, the function ‘survfit’ in the package SURVIVAL can be used for Kaplan-Meier estimates.

The generalised linear model can be estimated using the object ‘geese’ in the package GEEPACK.

For a more detailed description of the technical implementation see Klein et al. [5].

**Additional file 1: Table S1:** Specification of the simulated scenarios: parameter values and ‘true’ 5-year survival probabilities

| Scenario |                    | Survival times |               |                    |                |         |            | Waiting times <sup>1</sup> |            |             | True survival probabilities <sup>2</sup> |          |       |
|----------|--------------------|----------------|---------------|--------------------|----------------|---------|------------|----------------------------|------------|-------------|------------------------------------------|----------|-------|
|          |                    | Transition 0→2 |               |                    | Transition 1→2 |         |            | Transition 0→1             |            |             | $S_0(5)$                                 | $S_1(5)$ |       |
|          |                    | $1-\pi_{02}$   | $\omega_{02}$ | $\mathcal{G}_{02}$ | $r$            | $\pi_T$ | $\omega_T$ | $\mathcal{G}_T$            | $\pi_{01}$ | $\mu_{01}$  | $\sigma_{01}$                            |          |       |
| I        | Discrete           | 0.18           | 0.150         | 1.5                | 0.1            | 0.15    | 3          | 1.3                        | 0.75       | -           | -                                        | 0.333    | 0.620 |
| A        | Balduzzi<br>2005   | 0.4            | 0.629         | 1.3                | 0.33           | 0.18    | 8.5        | 2.5                        | 0.25       | $\log(0.4)$ | 0.3                                      | 0.404    | 0.562 |
| B        | Gale<br>1998       | 0.18           | 0.179         | 1.5                | 0.1            | 0.35    | 3          | 1.3                        | 0.4        | $\log(0.5)$ | 0.3                                      | 0.291    | 0.547 |
| C        | Goldstone<br>2008  | 0.5            | 0.210         | 1.8                | 0.3            | 0.16    | 10         | 1.5                        | 0.4        | $\log(0.7)$ | 0.3                                      | 0.511    | 0.659 |
| D        | Locaciulli<br>2007 | 0.7            | 0.653         | 1.2                | 0.4            | 0.16    | 4          | 2.5                        | 0.4        | $\log(0.4)$ | 0.3                                      | 0.703    | 0.703 |
| E        | PH                 | 0.18           | 0.179         | 1.5                | 0.75           | 0       | -          | -                          | 0.4        | $\log(0.5)$ | 0.3                                      | 0.291    | 0.390 |
| F        | No diff.           | 0.5            | 0.210         | 1.8                | 1              | 0       | -          | -                          | 0.4        | $\log(0.7)$ | 0.3                                      | 0.511    | 0.511 |
| G        | Late<br>SCTs       | 0.18           | 0.150         | 1.5                | 0.1            | 0.15    | 3          | 1.3                        | 0.45       | $\log(2)$   | 0.8                                      | 0.333    | 0.569 |

1)  $t^{search}=t^*=5$  years

2) True survival probabilities  $S_0(5)$  and  $S_1(5)$  were calculated using computations and simulations in SAS and numerical integration in

Mathematica according to equation (3) and (2) of the main paper, respectively.

**Additional file 1: Table S2:** Model-based and Monte-Carlo standard-errors for simulation study 1

|                     |          |     | wGLM <sup>1</sup>              |                                | WGLM ad-hoc <sup>2</sup>       |                                |
|---------------------|----------|-----|--------------------------------|--------------------------------|--------------------------------|--------------------------------|
|                     | Donor    | w   | SE <sub>est</sub> <sup>3</sup> | SD <sub>sim</sub> <sup>4</sup> | SE <sub>est</sub> <sup>3</sup> | SD <sub>sim</sub> <sup>4</sup> |
| n=1000 <sup>5</sup> | No Donor | --  | 0.125                          | 0.128                          | 0.125                          | 0.128                          |
|                     | Yes      | --  | 0.078                          | 0.070                          | 0.098                          | 0.104                          |
|                     |          | 0.5 | 0.164                          | 0.158                          | 0.172                          | 0.168                          |
|                     |          | 1   | 0.134                          | 0.132                          | 0.161                          | 0.158                          |
|                     |          | 3   | 0.106                          | 0.083                          | 0.191                          | 0.177                          |
| n=400 <sup>5</sup>  | No Donor | --  | 0.210                          | 0.216                          | 0.210                          | 0.216                          |
|                     | Yes      | --  | 0.124                          | 0.112                          | 0.156                          | 0.171                          |
|                     |          | 0.5 | 0.263                          | 0.253                          | 0.277                          | 0.269                          |
|                     |          | 1   | 0.224                          | 0.211                          | 0.269                          | 0.254                          |
|                     |          | 3   | 0.170                          | 0.129                          | 0.309                          | 0.286                          |

- 1) The weighted generalised linear model (wGLM) uses  $\hat{V}_{i,1}(t^*)$  according to equation (6)
- 2) The weighted generalised linear model (wGLM) uses the ad-hoc correction suggested to estimate  $\hat{V}_{i,1}(t^*)$  (with one repetition per observation per simulation run)
- 3) Mean of standard errors of the generalised linear model (empirical ‘sandwich’ estimator)
- 4) Standard deviations of the parameter estimates of 1000 simulation runs (Monte-Carlo standard deviations)
- 5) Entire sample with and without a donor with 25 % in every subgroup: without donor and donor found at  $w=0.5, 1$  and  $3$ , respectively



**Additional file 1: Table S3:** Model-based and Monte-Carlo standard-errors for simulation study 2

| $\beta_0$           | uniform censoring | n=1000 <sup>3</sup>            |                                | n=400 <sup>3</sup>             |                                |
|---------------------|-------------------|--------------------------------|--------------------------------|--------------------------------|--------------------------------|
|                     |                   | SE <sub>est</sub> <sup>1</sup> | SD <sub>sim</sub> <sup>2</sup> | SE <sub>est</sub> <sup>1</sup> | SD <sub>sim</sub> <sup>2</sup> |
| <b>A</b>            | 0-11              | 0.053                          | 0.051                          | 0.085                          | 0.082                          |
| <b>B</b>            | 0-11              | 0.062                          | 0.063                          | 0.098                          | 0.095                          |
| <b>C</b>            | 0-11              | 0.067                          | 0.068                          | 0.107                          | 0.107                          |
| <b>D</b>            | 0-11              | 0.079                          | 0.080                          | 0.126                          | 0.126                          |
| <b>E</b>            | 0-11              | 0.062                          | 0.062                          | 0.098                          | 0.095                          |
| <b>F</b>            | 0-11              | 0.067                          | 0.068                          | 0.107                          | 0.107                          |
| <b>G</b>            | 0-11              | 0.060                          | 0.063                          | 0.095                          | 0.097                          |
| <b>G</b>            | 0-6               | 0.083                          | 0.083                          | 0.133                          | 0.132                          |
| $\beta_0 + \beta_1$ |                   |                                |                                |                                |                                |
| <b>A</b>            | 0-11              | 0.111                          | 0.111                          | 0.177                          | 0.181                          |
| <b>B</b>            | 0-11              | 0.087                          | 0.092                          | 0.137                          | 0.142                          |
| <b>C</b>            | 0-11              | 0.099                          | 0.098                          | 0.157                          | 0.154                          |
| <b>D</b>            | 0-11              | 0.101                          | 0.105                          | 0.161                          | 0.162                          |
| <b>E</b>            | 0-11              | 0.082                          | 0.081                          | 0.130                          | 0.129                          |
| <b>F</b>            | 0-11              | 0.087                          | 0.087                          | 0.138                          | 0.142                          |
| <b>G</b>            | 0-11              | 0.115                          | 0.125                          | 0.182                          | 0.187                          |
| <b>G</b>            | 0-6               | 0.149                          | 0.154                          | 0.239                          | 0.246                          |
| $\beta_1$           |                   |                                |                                |                                |                                |
| <b>A</b>            | 0-11              | 0.123                          | 0.122                          | 0.196                          | 0.196                          |
| <b>B</b>            | 0-11              | 0.107                          | 0.112                          | 0.169                          | 0.173                          |
| <b>C</b>            | 0-11              | 0.119                          | 0.118                          | 0.190                          | 0.184                          |
| <b>D</b>            | 0-11              | 0.129                          | 0.127                          | 0.204                          | 0.201                          |
| <b>E</b>            | 0-11              | 0.103                          | 0.101                          | 0.163                          | 0.161                          |
| <b>F</b>            | 0-11              | 0.110                          | 0.109                          | 0.174                          | 0.174                          |
| <b>G</b>            | 0-11              | 0.131                          | 0.132                          | 0.208                          | 0.204                          |
| <b>G</b>            | 0-6               | 0.173                          | 0.169                          | 0.278                          | 0.268                          |

- 1) Mean of standard errors of the generalised linear model (empirical ‘sandwich’ estimator)
- 2) Standard deviations of the parameter estimates of 1000 simulation runs (Monte-Carlo standard deviations)
- 3) entire sample with and without a donor

**Additional file 1: Figure S1:** Survival scenarios used in simulation study 2 with  $t^{search}=5$  years

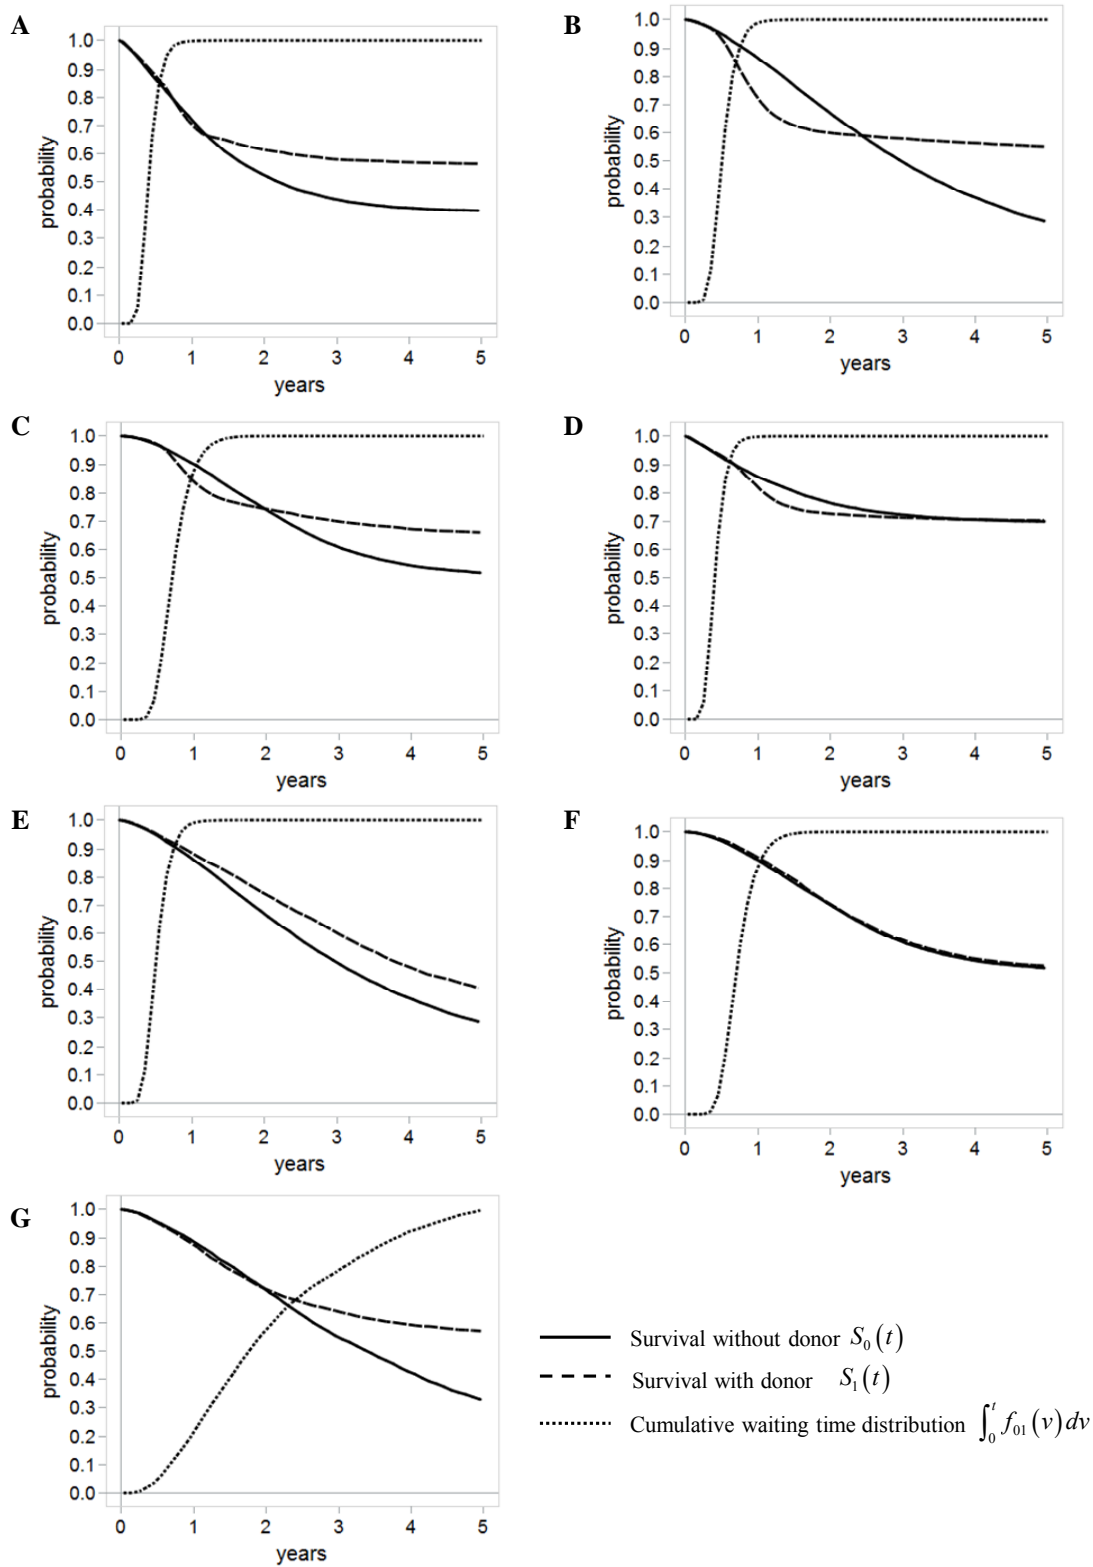

## References

1. Andersen PK, Pohar Perme M: **Pseudo-observations in survival analysis**. *Statistical methods in medical research* 2010, **19**(1):71-99.
2. Jacobsen M, Martinussen T: **A Note on the Large Sample Properties of Estimators Based on Generalized Linear Models for Correlated Pseudo-observations**. *Scandinavian Journal of Statistics* 2016, **43**(3):845-862.
3. Rotnitzky A, Robins JM: **Inverse Probability Weighting in Survival Analysis**. In: *Encyclopedia of Biostatistics*. Edited by Armitage P, Colton T: John Wiley; 2005.
4. Sposto R: **Cure model analysis in cancer: an application to data from the Children's Cancer Group**. *Statistics in Medicine* 2002, **21**(2):293-312.
5. Klein JP, Gerster M, Andersen PK, Tarima S, Pohar Perme M: **SAS and R functions to compute pseudo-values for censored data regression**. *Computer Methods and Programs in Biomedicine* 2008, **89**(3):289-300.
